# Supplementary material for: Increased LGR6 Expression Sustains Long-Term Wnt Activation and Acquisition of Senescence in Epithelial Progenitors in Chronic Lung Diseases
Source: MDPI journal article supplement (doi:10.3390/cells10123437), 2021-12-07
Supplement: s1 [file s1]

# Supplementary Material to Cortesi et al., “Increased LGR6 expression sustains long-term Wnt activation and acquisition of senescence in epithelial progenitors in chronic lung diseases”.

All figures and tables are cited in the main text.

**Table S1.** Demographic data and smoking history of all recruited patients. Data are reported as mean  $\pm$  SD. Patients with COPD and IPF were all end-stage cases. *F*, female; *M*, male; *ns*, non-smoker; *es*, ever smoker; *u*, unknown; COPD, Chronic Obstructive Pulmonary Disease; IPF, Idiopathic Pulmonary Fibrosis.

|                 |           | Donors            | COPD             | IPF              |
|-----------------|-----------|-------------------|------------------|------------------|
| N.              |           | 7                 | 15               | 7                |
| Sex             | <i>F</i>  | 1                 | 6                | 3                |
|                 | <i>M</i>  | 6                 | 9                | 4                |
| Age             |           | 45,43 $\pm$ 16,97 | 59,4 $\pm$ 5,55  | 63,86 $\pm$ 1,68 |
| Smocking status | <i>ns</i> | 4                 | 0                | 0                |
|                 | <i>es</i> | 1                 | 15               | 7                |
|                 | <i>u</i>  | 2                 | 0                | 0                |
| Pack year       |           | <i>es</i> = 10    | 31,87 $\pm$ 16,7 | 23,29 $\pm$ 12,8 |

**Table S2.** List of antibodies. Primary antibodies used for manual immunohistochemical and immunofluorescent stainings are listed in alphabetical order.

| Protein                  | Clone                  | Host and isotype | Ref.      | Brand                               | Dilution     |
|--------------------------|------------------------|------------------|-----------|-------------------------------------|--------------|
| CC10                     | E-11                   | mouse IgG1       | sc-365992 | Santa Cruz, Heidelberg, Germany     | 1:500        |
|                          | H-75                   | rabbit IgG       | sc-25554  | Santa Cruz, Heidelberg, Germany     | 1:500        |
| CK5                      | XM26                   | mouse IgG1       | NCL-L-CK5 | Novocastra, Newcastle upon Tyne, UK | 1:100        |
| Glutamine synthetase     | 6/Glutamine Synthetase | mouse IgG2a      | 610518    | BD Biosciences, San Diego, CA, USA  | 1:400        |
| KI67                     | MIB-1                  | mouse IgG1       | IR626     | Dako, Glostrup, Denmark             | ready-to-use |
| LGR6                     | EPR6874                | rabbit IgG       | ab126747  | Abcam, Waltham, MA, USA             | 1:150        |
| p16 <sup>INK4A</sup>     | 2D9A12                 | mouse IgG2b      | ab54210   | Abcam, Waltham, MA, USA             | 1:2000       |
| p21 <sup>CIP1/WAF1</sup> | SX118                  | mouse IgG1       | M720229-2 | Dako, Glostrup, Denmark             | 1:30         |
|                          | C-19                   | rabbit IgG       | sc-397    | Santa Cruz, Heidelberg, Germany     | 1:20         |
| p63                      | DAK-p63                | mouse IgG2a      | M7317     | Dako, Glostrup, Denmark             | 1:30         |
| SPC                      | H-8                    | mouse IgG2b      | sc-518029 | Santa Cruz, Heidelberg, Germany     | 1:500        |

|                                             |                 |            |        |                                       |       |
|---------------------------------------------|-----------------|------------|--------|---------------------------------------|-------|
|                                             | ---             | rabbit IgG | AB3786 | Merck, Darmstadt, Germany             | 1:500 |
| <b>Total<br/><math>\beta</math>-catenin</b> | 14/Beta-Catenin | mouse IgG1 | 610154 | BD Biosciences, San Diego, CA,<br>USA | 1:200 |

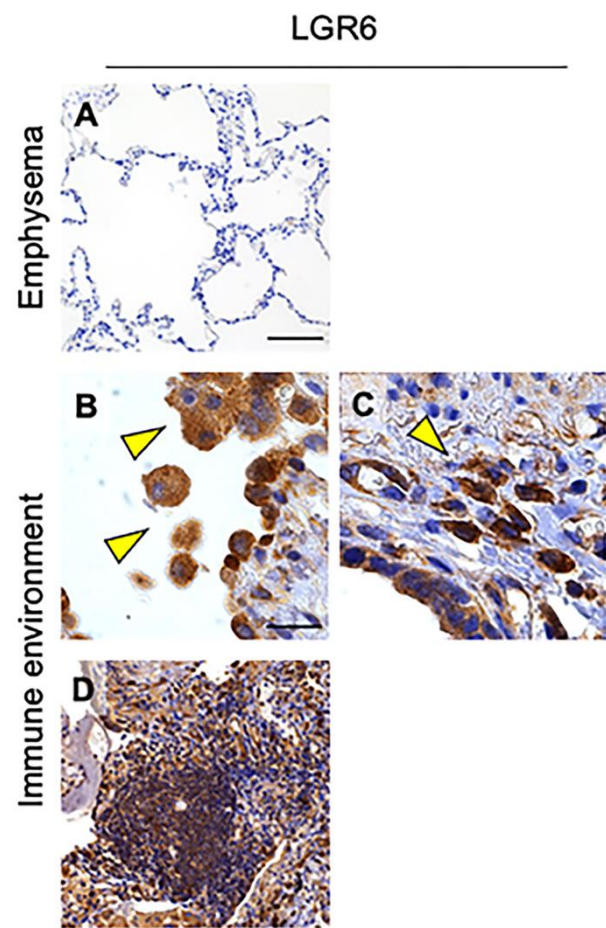

**Figure S1.** Expression of LGR6 in the tissue environment. **A:** In COPD samples, emphysema lesions were extensively observed in alveolar regions. Emphysematous areas were negative for LGR6 expression (A; bar = 100μm). **B-D:** In contrast, both in IPF and COPD, medium to high levels of LGR6 were reported in alveolar (B) and interstitial (C) macrophages, respectively (arrows; bar = 20μm). Moreover, increased LGR6 expression was observed in cells of lymphoid follicles of COPD and IPF lungs (D; refer to bar in Supplementary Figure 1A).

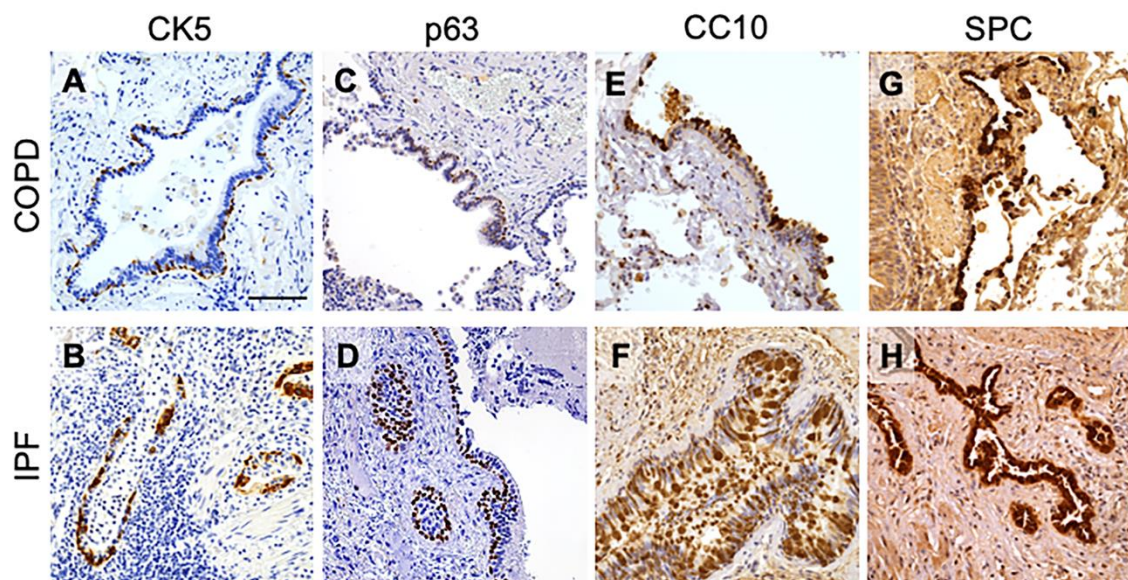

**Figure S2.** Alteration of progenitor cells niches in the lungs with COPD and IPF. **A-H:** Bronchiolar and alveolar compartments present profound rearrangements in COPD and IPF. Heavily damaged bronchioles showed loss and/or altered localization of basal progenitors (A-D; bar = 100µm), club cells (E-F) and ATII cells (G-H).

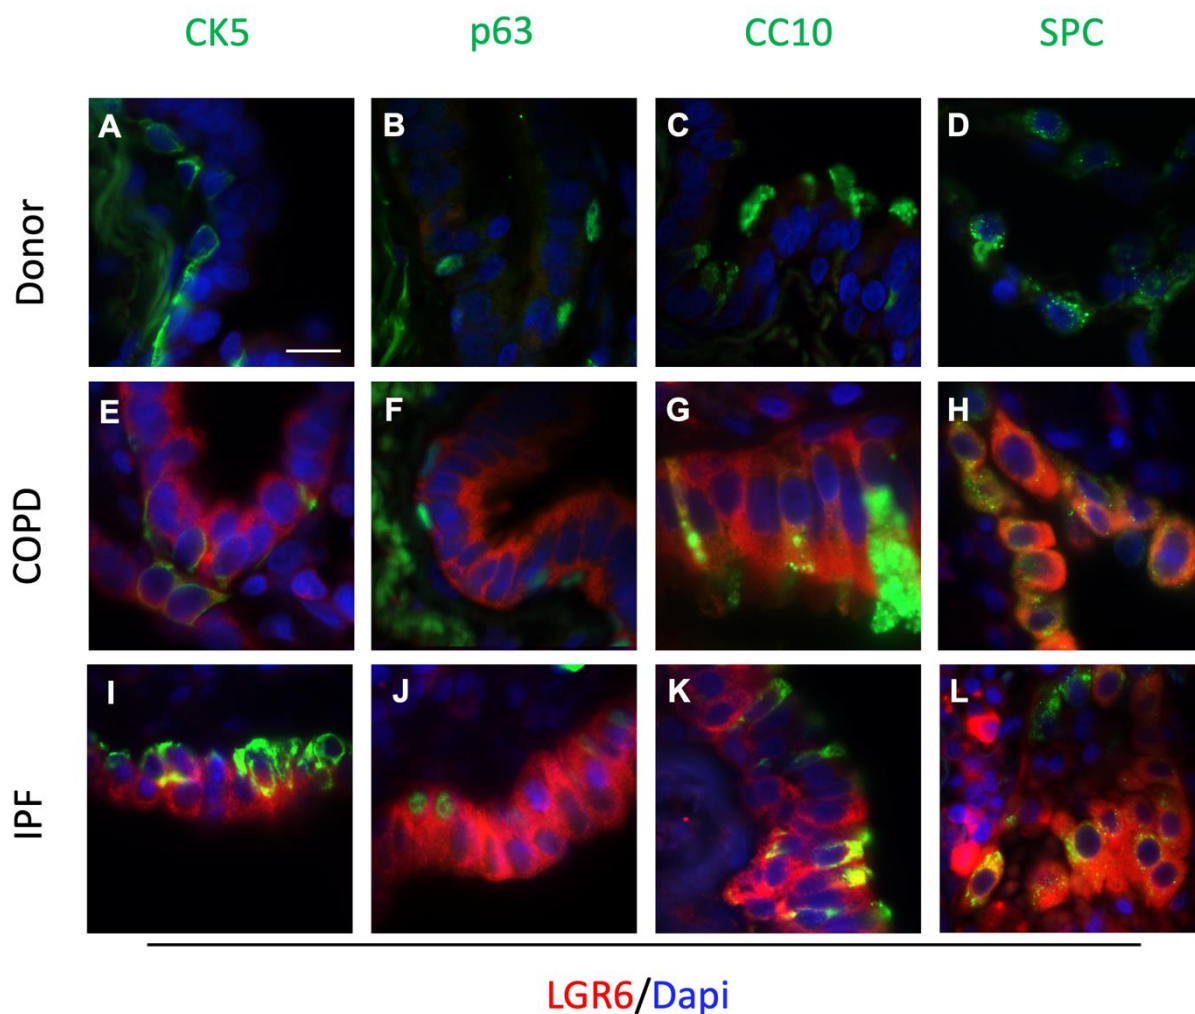



**Figure S3.** LGR6 expression in progenitor populations. A-L: Immunofluorescent stainings of Donor, COPD (A-H) and IPF (I-P) tissues revealed co-expression between LGR6 and epithelial progenitor markers CK5, p63, CC10 and SPC (bar = 20 $\mu$ m).

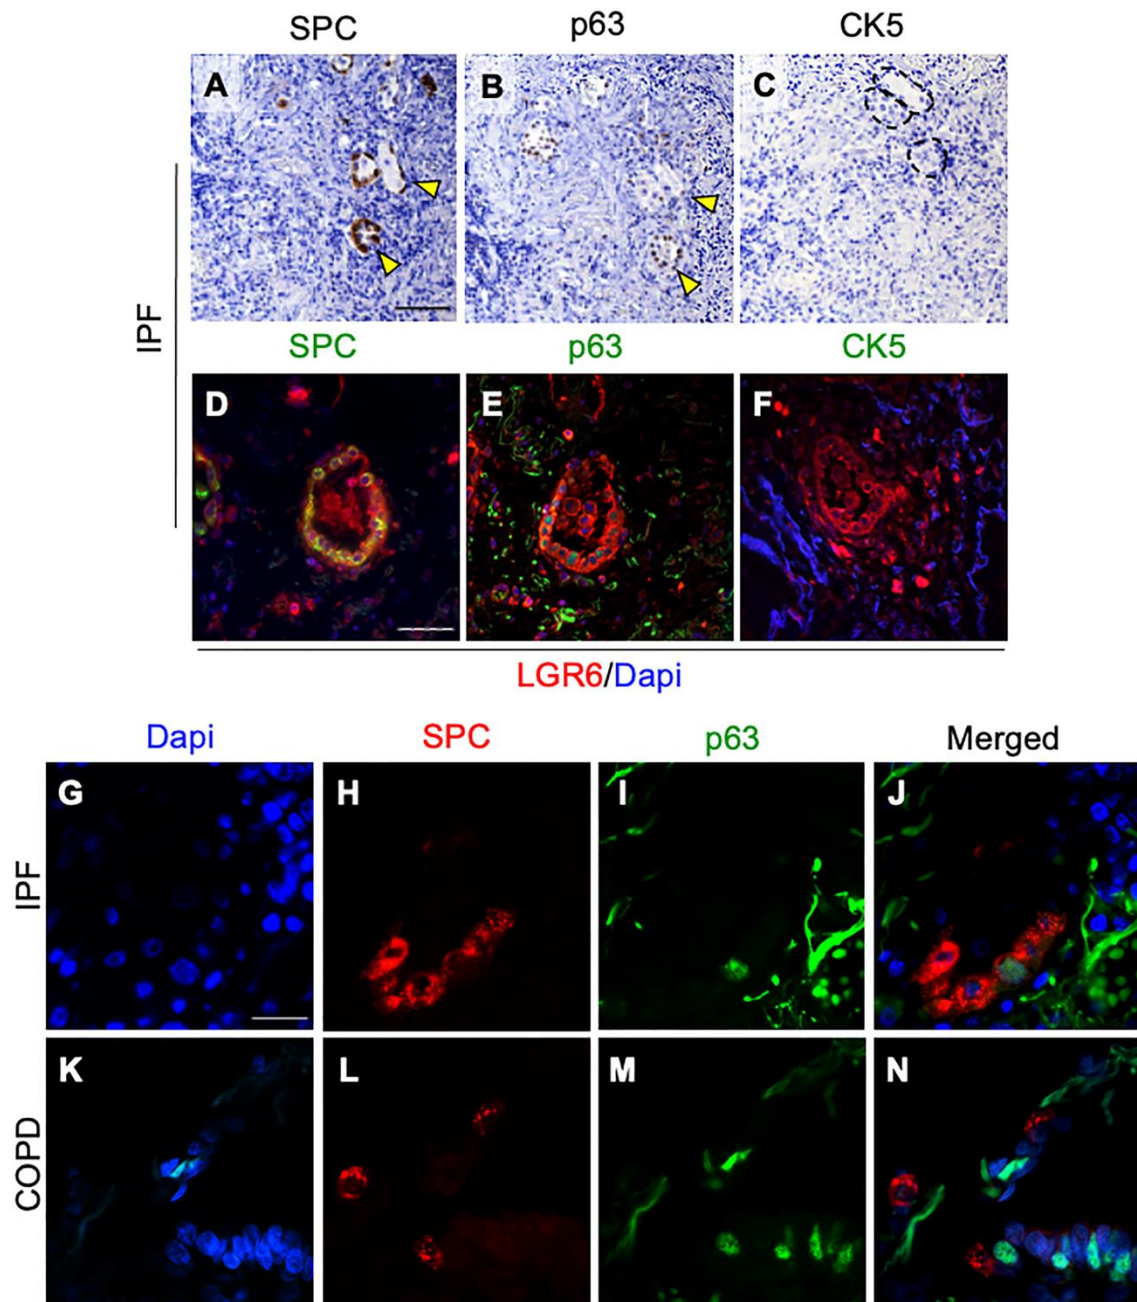

**Figure S4.** LGR6 in alveolar and basal progenitors. A-F: In consecutive slides, at the bronchioles-alveoli interphase, narrowed alveolar regions showed expression of SPC and p63, but not CK5 (A-C; arrows and lines, bar = 100 $\mu$ m). Co-expression between LGR6<sup>+</sup>/SPC<sup>+</sup> and LGR6<sup>+</sup>/p63<sup>+</sup>/CK5<sup>-</sup> cells was observed in these lesions (D-F; bar = 50 $\mu$ m). G-N: SPC and p63 were co-expressed in few cells of narrowed alveolar IPF lesions (G-J; bar = 20 $\mu$ m). Only in rare occasions, co-expression between SPC and p63 markers was reported (K-N).

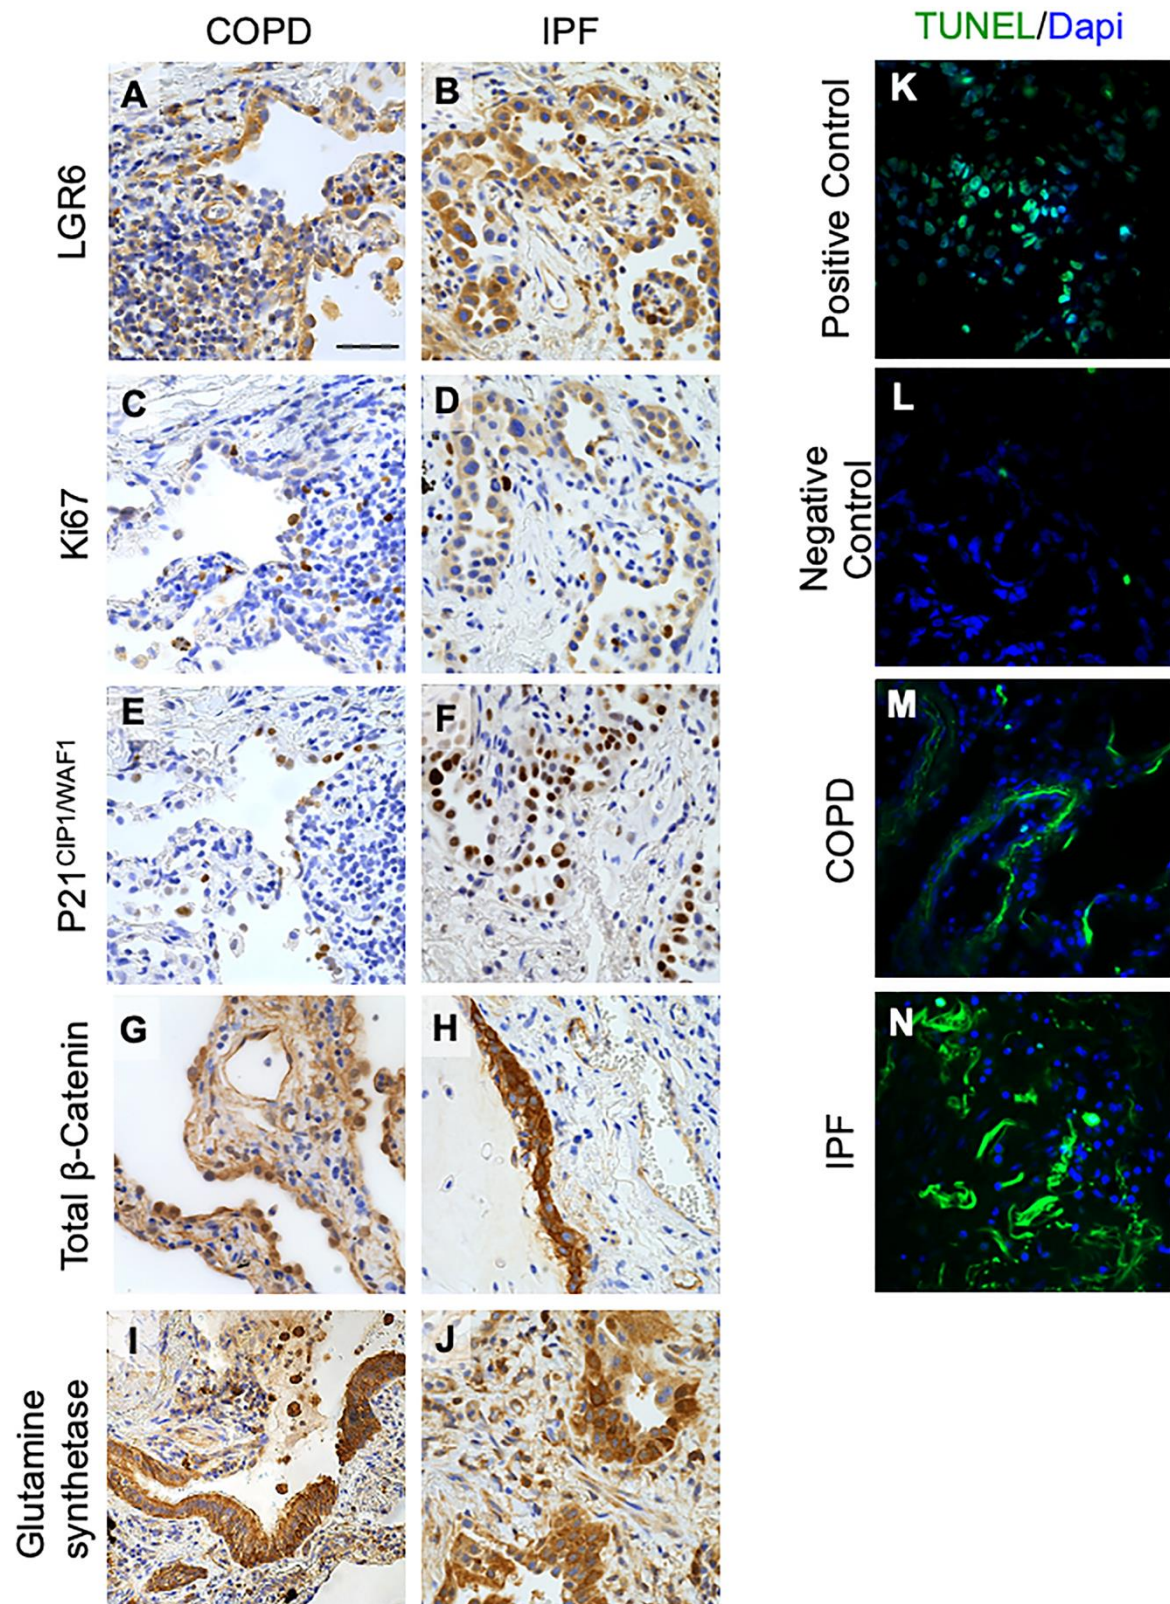

**Figure S5.** Non proliferating LGR6+ cells express markers of senescence and Wnt pathway activation, but not markers of apoptosis. **A-J:** In COPD and IPF, high levels of LGR6 (**A,B**; bar = 50μm) are associated with low proliferation (**C,D**), and increase in expression of senescence-associated (**E,F**) and Wnt-related (**G-J**) markers in epithelial progenitors. **K-N:** In situ apoptosis was evaluated through TUNEL assay, but no positive epithelial cells were detected (bar = 50μm).



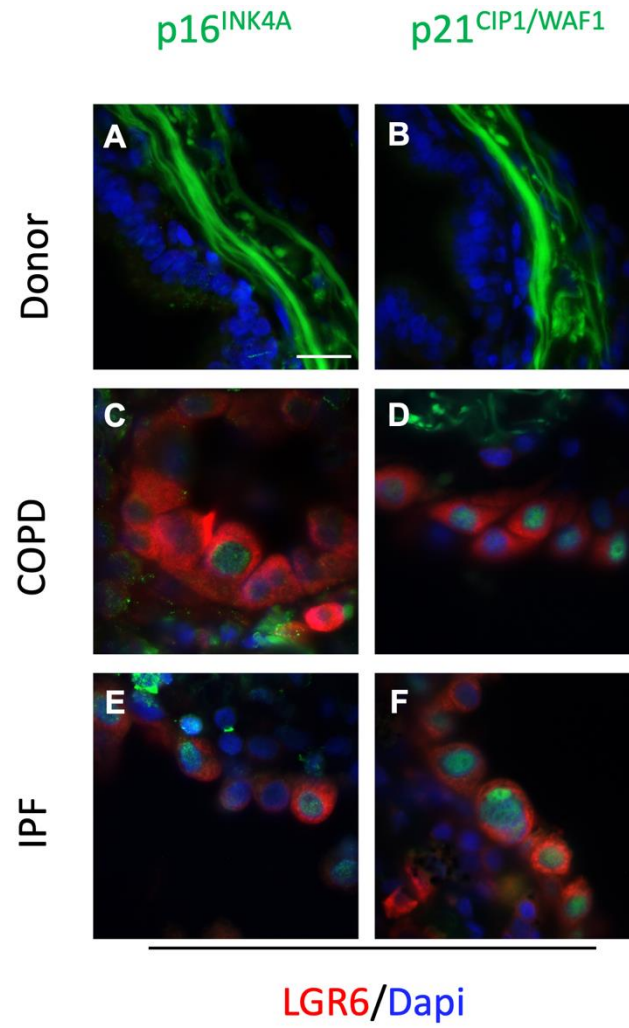

**Figure S6.** Senescent LGR6+ cells accumulate in COPD and IPF tissues. **A-F:** Immunofluorescent stainings of Donor, COPD (A-H) and IPF (I-P) tissues shows expression of  $p16^{INK4A}$  and/or  $p21^{CIP1/WAF1}$  in LGR6-positive cells (bar = 20 $\mu$ m).

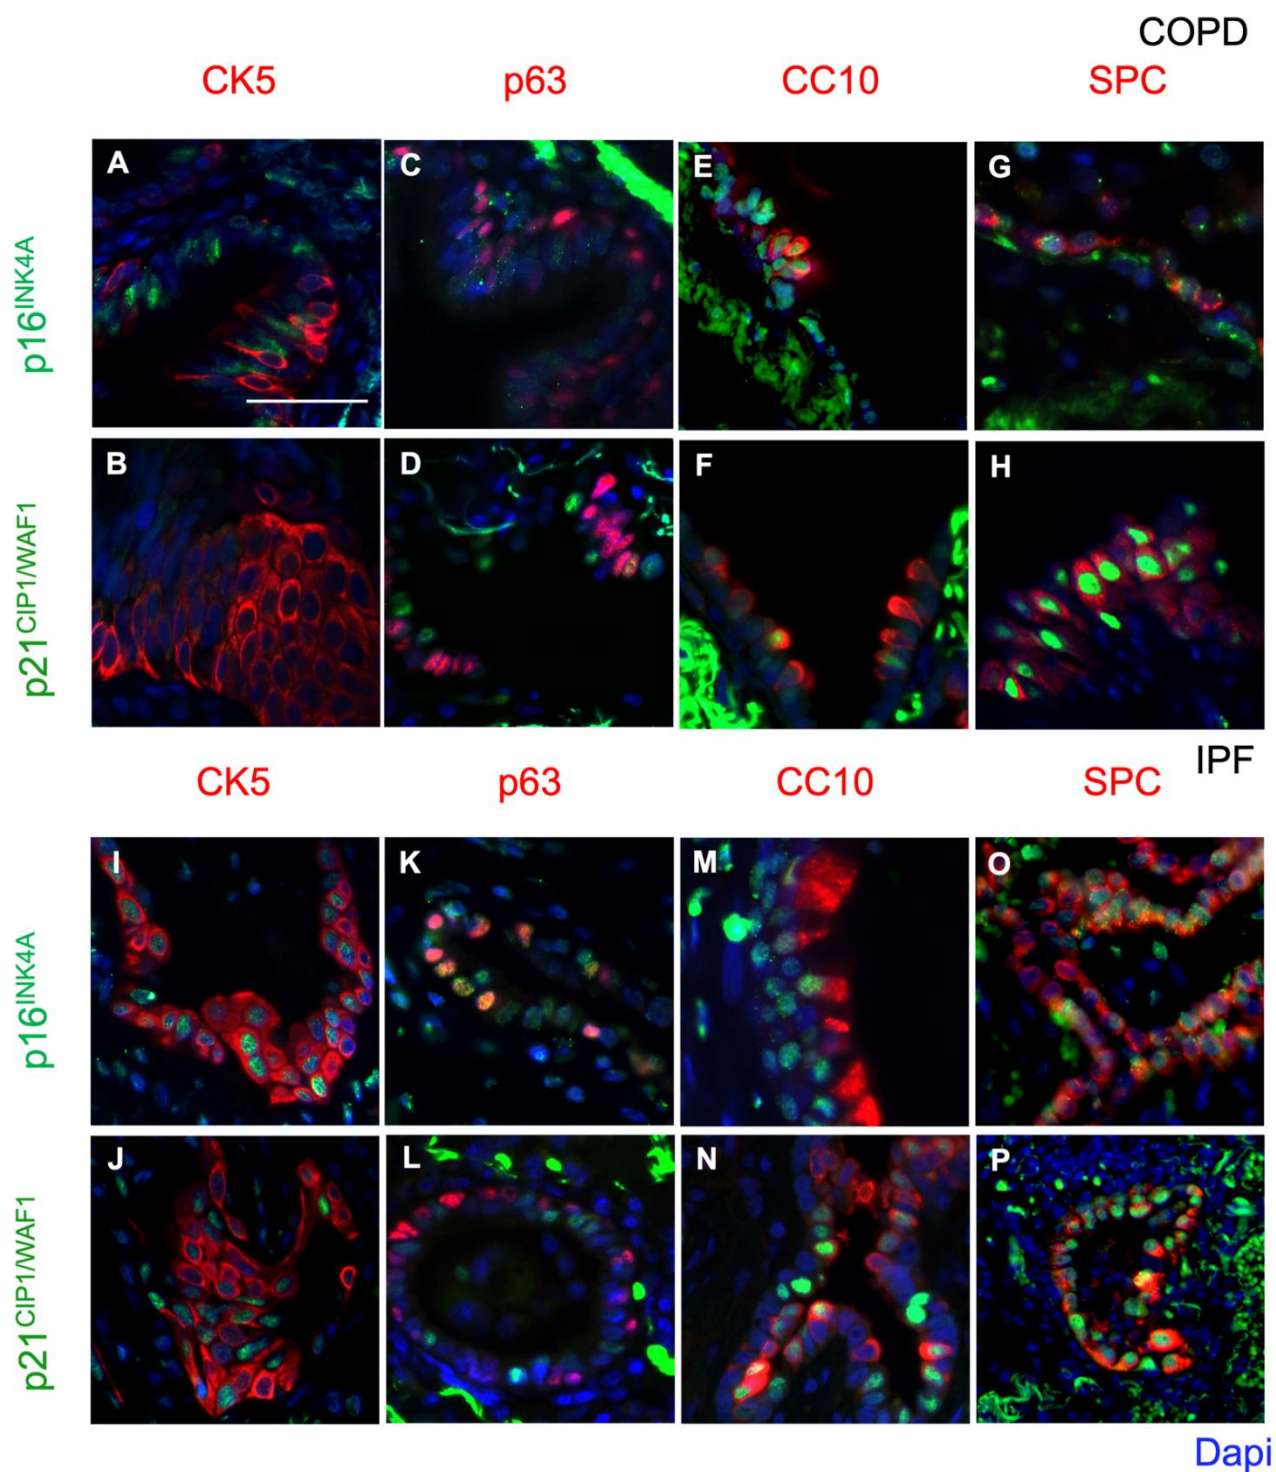

**Figure S7.** Lung epithelial progenitors show expression of senescence-associated markers. **A-P:** Immunofluorescent stainings of COPD (A-H) and IPF (I-P) tissues revealed co-expression between epithelial progenitor markers and p16<sup>INK4A</sup> and/or p21<sup>CIP1/WAF1</sup> (bar = 50μm).
